# Supplementary material for: Pulmonary immune cell trafficking promotes host defense against alcohol-associated Klebsiella pneumonia
Source: PubMed Central journal article supplement (PMC8382828; doi:10.1038/s42003-021-02524-0), 2021-08-23

## Supplemental Methods:

### Indole-metabolites detection by HPLC

Indole and its microbial metabolites were extracted with methanol. The cecal extracts were re-dissolved in 50% methanol for HPLC analysis (Waters, MA, USA) on a ZORBAX Eclipse XDB-C18 column (150 mm × 2.1 mm, 3.5 μm, Agilent Technologies, USA) at a flow rate of 0.25 mL/min. The linear gradient elution condition was: 20% mobile phase A (5% methanol/water with 0.1% formic acid) / 80% mobile phase B (100% methanol with 0.1% formic acid) for 3 min initially, then shifted to 50% B over 2 min and held at 50% B for an additional 10 min. The elution was monitored at UV 280 nm.

## Supplemental Figure:

**Supplemental Figure 1: Alcohol-feeding model characteristics Experiment 1.** (A) Mouse weights in all groups at the start and end of the experimental period. (B) Average food intake in all groups. (C) Blood alcohol content of alcohol-fed mice with and without treatment. Bars represent the mean ± SEM. N = 10/group.

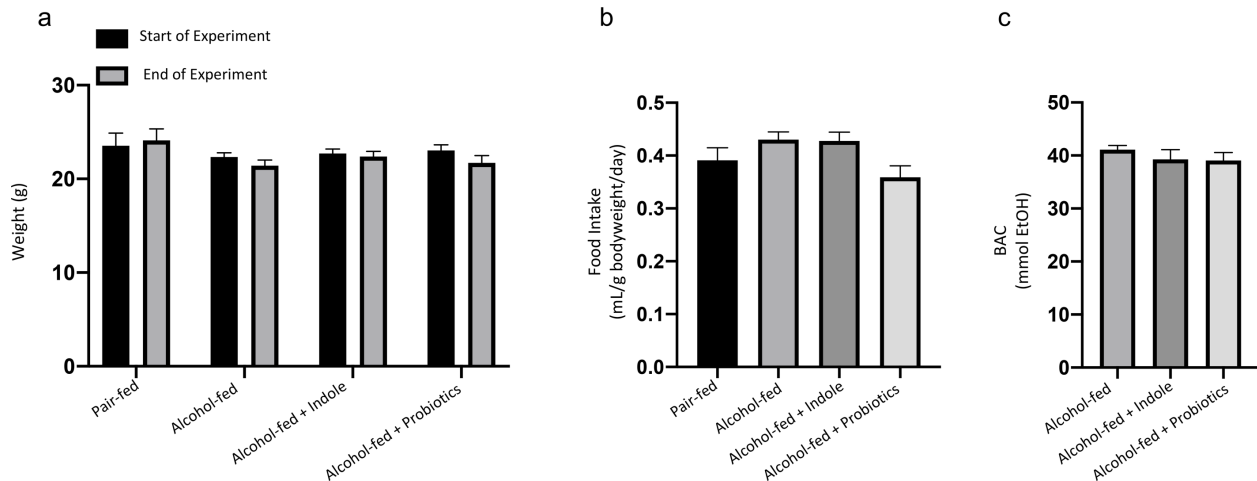

**Supplemental Figure 2: Alcohol-feeding model characteristics Experiment 2.** (A) Mouse weights in all groups at the start and end of the experimental period. (B) Average food intake in all groups. (C) Blood alcohol content of alcohol-fed mice with and without treatment. Bars represent the mean  $\pm$  SEM. N = 10/group.

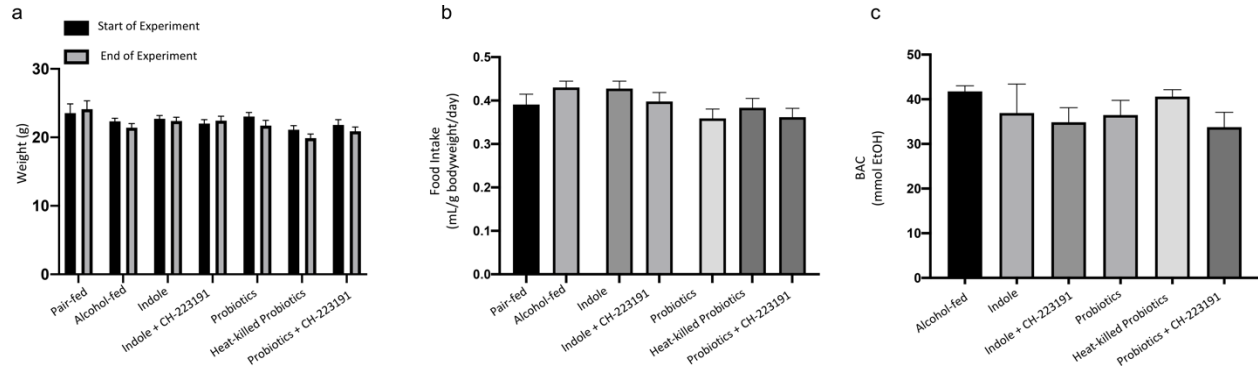

**Supplemental Figure 3: Indole and probiotics alter intestinal indole metabolite concentrations of alcohol-fed mice.** Binge-on-chronic alcohol-fed mice with and without treatment were infected with *Klebsiella* and sacrificed 48 hrs. post infection and the cecal concentrations of (a) indole-3-sulfate, (b) indole-3-acetic acid, (c) indole-3-lactic acid, and (d) indole-3-propionic acid were determined by HPLC. Bars represent the mean  $\pm$  SEM and dots represent individual mice. P values are indicated in the figure and were determined by one-way ANOVA with Sidak's multiple comparison test. N = 5/group.

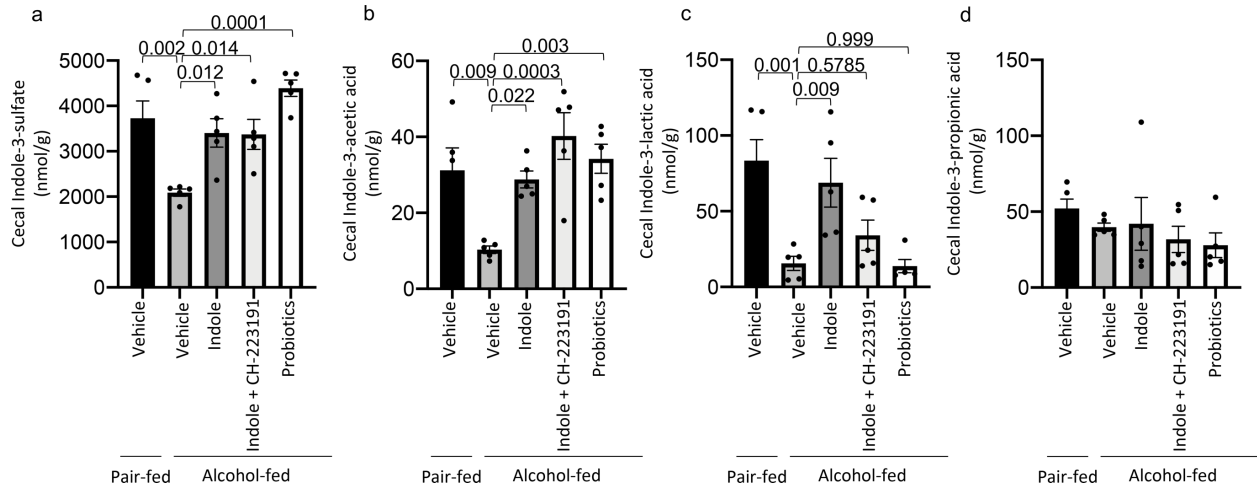

**Supplemental Figure 4: TCDD increase AhR activation.** DR-EcoScreen cells were treated with increasing concentrations of TCDD, to detect AhR agonistic activity. (a) Dose–response curves of TCDD in the DR-EcoScreen assay. (b) Indole’s present AhR agonistic activity compared to  $10^{-10}$  M TCDD. Bars represent the mean  $\pm$  SEM and dots represent individual mice. P values are indicated in the figure and were determined by one-way ANOVA with Sidak’s multiple comparison test. N = 3/group.

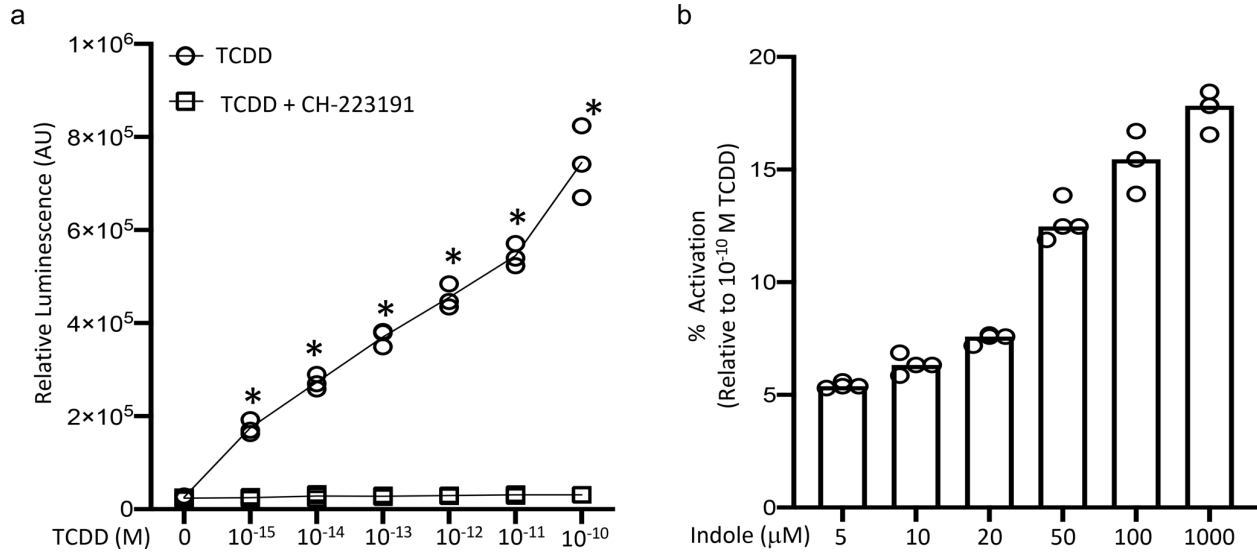

**Supplemental Figure 5: Indole and probiotics alter the intestinal microbiota's inferred functional capacity.** Binge-on-chronic alcohol-fed mice with and without treatment were infected with *Klebsiella* and sacrificed 48 hrs. post infection. (a) Principle coordinate analysis of the inferred functional capacities of the cecal microbiota from alcohol-fed mice with and without treatment. (b-e) Representative pathways and the relative differences between the significant groups, as determined using ANOVA followed by Tukey-Kramer post-hoc analysis with corrections for multiple comparison via FDR within the STAMP platform. N = 5/group.

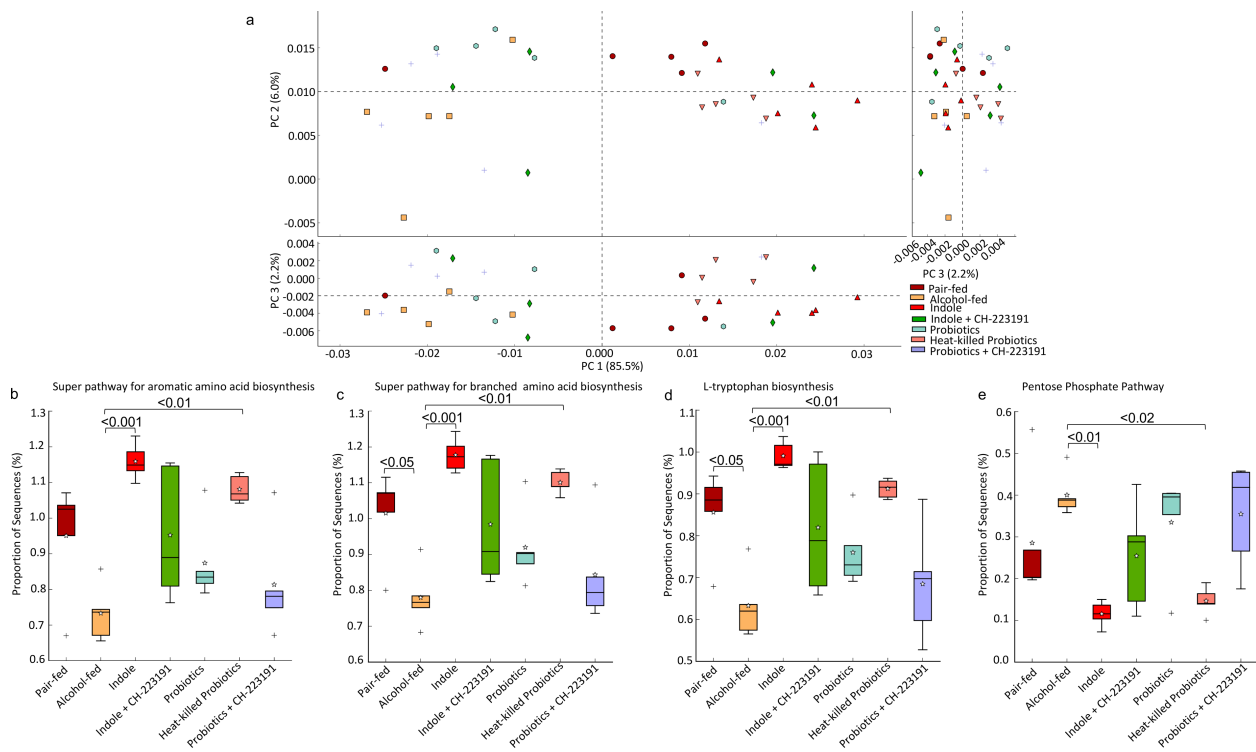

**Supplemental Figure 6: Intestinal microbial structure and inferred functional capacity of alcohol-fed mice.** (a) Abundance plots for *Lactobacillus reuteri*, and *Bifidobacterium animalis* in alcohol-fed and treated mice. Differentially abundant OTUs at the (b) phylum and (c) family level as determined by DESeq2. (b) Heat-map of significantly different metabolic pathways between groups of mice. N = 5/group.

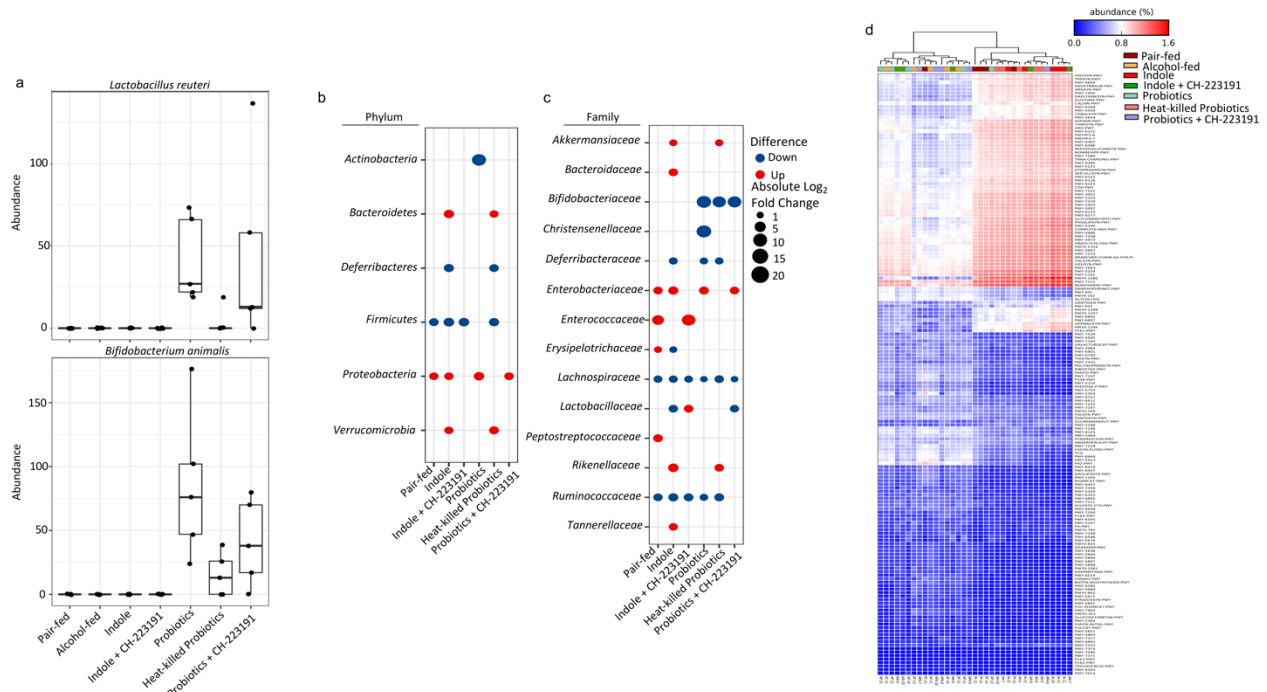

**Supplemental Figure 7: Microbiota supplementation mitigates alcohol-associated extrapulmonary cell trafficking.** The percentage of CFSE+ CD45+ immune cells in the (a) intestinal tract, (b) liver, and (c) spleen 48 hrs. post infection. Bars represent the mean  $\pm$  SEM and dots represent individual mice. P values are indicated in the figure and were determined by one-way ANOVA with Sidak's multiple comparison test. N = 5/group.

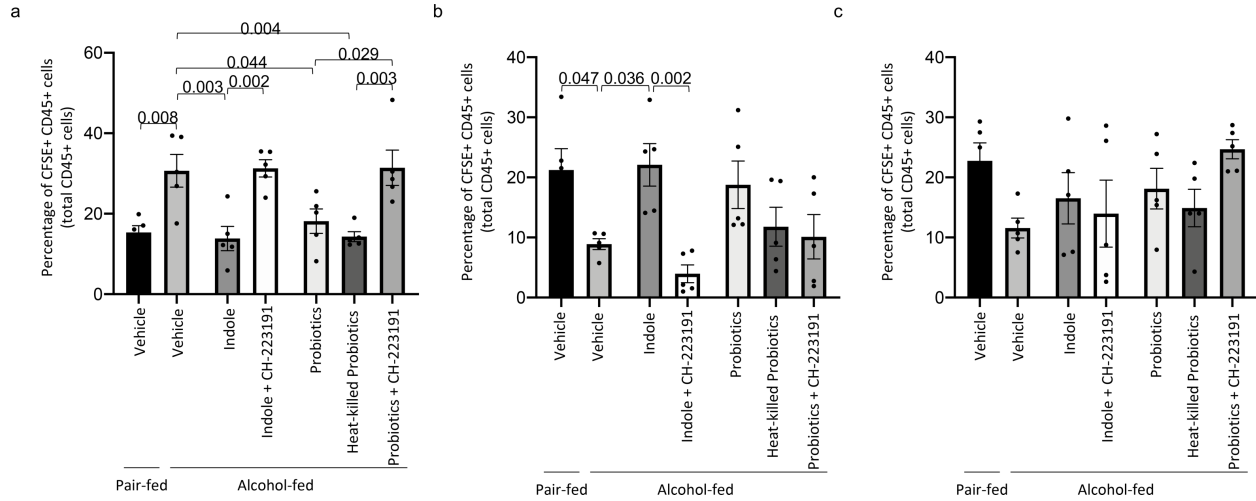

**Supplemental Figure 8: CFSE histograms.** Representative flow cytometry histograms from binge-on-chronic alcohol-fed mice with and without treatment in the (a) lungs, (b) intestine, (c) spleen, and (d) liver.

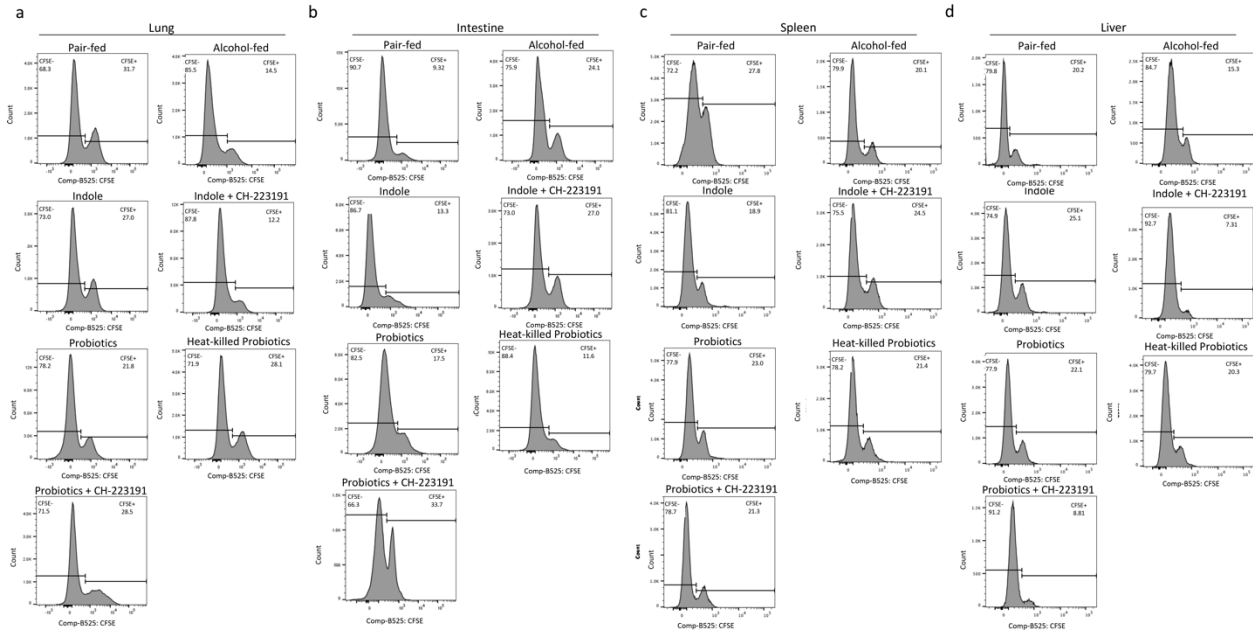

Supplement: 42003_2021_2524_MOESM2_ESM.pdf [file 42003_2021_2524_MOESM2_ESM.pdf]
